# Supplementary material for: Functional Redundancy in Perchlorate and Nitrate Electron Transport Chains and Rewiring Respiratory Pathways to Alter Terminal Electron Acceptor Preference
Source: Front Microbiol. 2018 Mar 6;9:376. doi: 10.3389/fmicb.2018.00376 (PMC5845722; doi:10.3389/fmicb.2018.00376)
Supplement: Table S2 — Strains used in this study; all strains are listed here; a brief description of strain genotype is also supplied. [file Table2.XLSX]

## Sheet: Strains
Strain Name	Species	Plasmid	Genotype (description)	Source or Reference
OW13	Azospira suillum PS	none	ΔnapO	This work
OW17	Azospira suillum PS	none	ΔpcrOΔnapO	This work
OW19	Azospira suillum PS	none	ΔpcrAΔnapC	This work
OW20	Azospira suillum PS	none	ΔpcrAΔnapO	This work
OW22	Azospira suillum PS	none	ΔnapGH	This work
OW38	Azospira suillum PS	none	ΔnapCΔnapO	This work
OW39	Azospira suillum PS	none	ΔnapCΔpcrO	This work
OW40	Azospira suillum PS	none	ΔpcrQΔnapO	This work
OW52	Azospira suillum PS	pBBR1MCS2	ΔpcrQΔnapC	This work
OW53	Azospira suillum PS	pOW26	ΔpcrQΔnapC	This work
OW54	Azospira suillum PS	pOW28	ΔpcrQΔnapC	This work
OW55	Azospira suillum PS	pOW31	ΔpcrQΔnapC	This work
OW56	Azospira suillum PS	pOW33	ΔpcrQΔnapC	This work
OW57	Azospira suillum PS	pBBR1MCS2	ΔpcrOΔnapO	This work
OW58	Azospira suillum PS	pOW27	ΔpcrOΔnapO	This work
OW59	Azospira suillum PS	pOW29	ΔpcrOΔnapO	This work
OW60	Azospira suillum PS	pOW32	ΔpcrOΔnapO	This work
OW61	Azospira suillum PS	pOW34	ΔpcrOΔnapO	This work
OW7	Azospira suillum PS	none	ΔnapA	This work
OW77	Azospira suillum PS	none	ΔnapCΔnapOΔpcrA	This work
OW78	Azospira suillum PS	none	ΔnapCΔpcrOΔpcrA	This work
OW79	Azospira suillum PS	none	ΔpcrQΔnapOΔpcrA	This work
OW80	Azospira suillum PS	none	ΔpcrQΔpcrOΔpcrA	This work
PS	Azospira suillum PS	none	wild-type	Coates Lab, University of California, Berkeley (Achenbach et al., 2001)
RAM035	Azospira suillum PS	none	ΔpcrA	Melnyk et al 2013
RAM038	Azospira suillum PS	none	ΔpcrQ	Melnyk et al 2013
RAM051	Azospira suillum PS	none	ΔPcrO	Melnyk et al 2013
RAM082	Azospira suillum PS	none	ΔnapCΔPcrQ	This work
RAM125	Azospira suillum PS	none	ΔNapC	This work
RAM126	Azospira suillum PS	none	ΔpcrQΔNapC	This work
