# Supplementary material for: Functional Redundancy in Perchlorate and Nitrate Electron Transport Chains and Rewiring Respiratory Pathways to Alter Terminal Electron Acceptor Preference
Source: Front Microbiol. 2018 Mar 6;9:376. doi: 10.3389/fmicb.2018.00376 (PMC5845722; doi:10.3389/fmicb.2018.00376)
Supplement: Table S6 — Specific growth rates (hr−1) of different mutants in Figure 4. [file Table6.XLSX]

## Sheet: Sheet1
Genotype	growth rate (diauxic nitrate)	growth rate (diaxuic perchlorate)
wild-type	0.220±0.050	0.167±0.016
ΔnapCΔnapO	0.143±0.017	0.144±0.004
ΔnapCΔpcrO	0.134±0.042	0.0970±0.003
ΔpcrQΔpcrO	0.251±0.042	0.0620±0.002
ΔpcrQΔnapO	0.073±0.013	0.157±0.002
ΔpcrA	0.207±0.025	0
ΔnapCΔnapOΔpcrA	0.069±0.02	0
ΔnapCΔpcrOΔpcrA	0.085±0.01	0
ΔpcrQΔnapOΔpcrA	0.107±0.005	0
ΔpcrQΔpcrOΔpcrA	0.215±0.012	0
